# Supplementary material for: Spermidine inhibits neurodegeneration and delays aging via the PINK1-PDR1-dependent mitophagy pathway in C. elegans
Source: publisher site journal article supplement (doi:10.18632/aging.103578), 2020-09-09
Supplement: Supplementary file [file aging-v12i17-103578-supplementary-material-SD1.pdf]

## SUPPLEMENTARY FIGURES

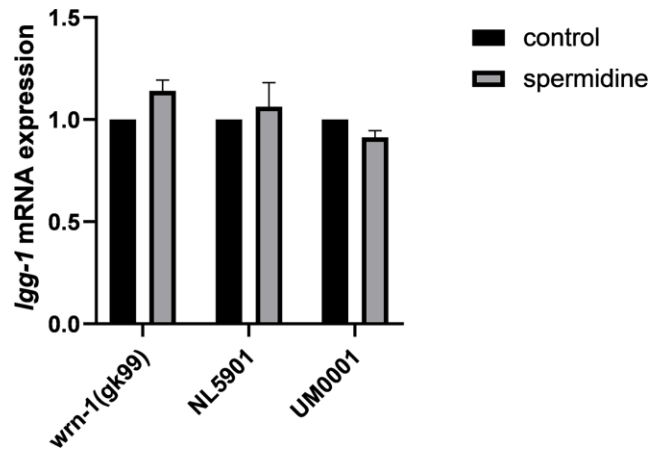

Supplementary Figure 1. Effect of 5mM spermidine treatment on autophagy-related gene *lgg-1* of *wrn-1(gk99)*, NL5901, UM0001 worms.

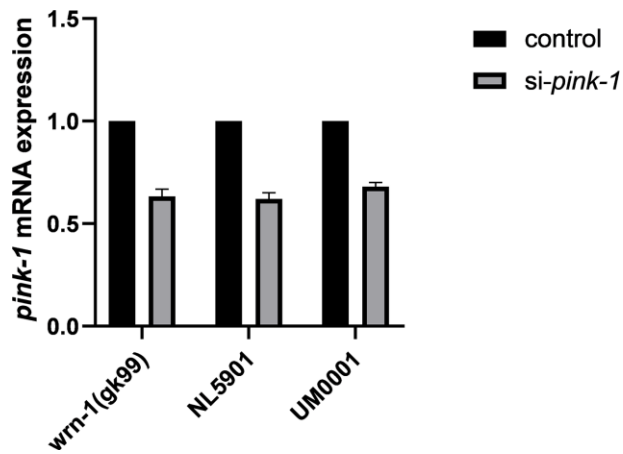

Supplementary Figure 2. RNAi knockdown of *pink-1* in *wrn-1(gk99)*, NL5901, UM0001 worms.

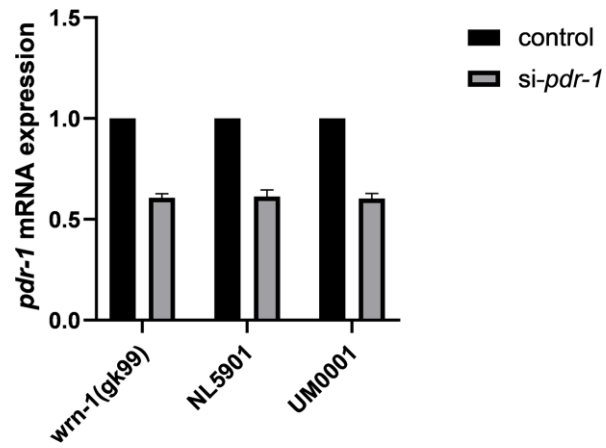

Supplementary Figure 3. RNAi knockdown of *pdr-1* in *wrn-1(gk99)*, NL5901, UM0001 worms.
